# Supplementary material for: A Nitrile Hydratase in the Eukaryote Monosiga brevicollis
Source: PubMed Central journal article supplement (PMC2603476; doi:10.1371/journal.pone.0003976), 2008-12-19
Supplement: pone.0003976.s001.pdf [file pone.0003976.s001.pdf]

| Sample | $\alpha$ | $\beta$ |
|--------|----------|---------|
| UniRef | 108      | 83      |
| GOS    | 199      | 170     |
| NPSG   | 9        | 5       |
| MSF    | 7        | 4       |
| WLF    | 1        | 3       |
