# Supplementary material for: A Nitrile Hydratase in the Eukaryote Monosiga brevicollis
Source: PubMed Central journal article supplement (PMC2603476; doi:10.1371/journal.pone.0003976), 2008-12-19

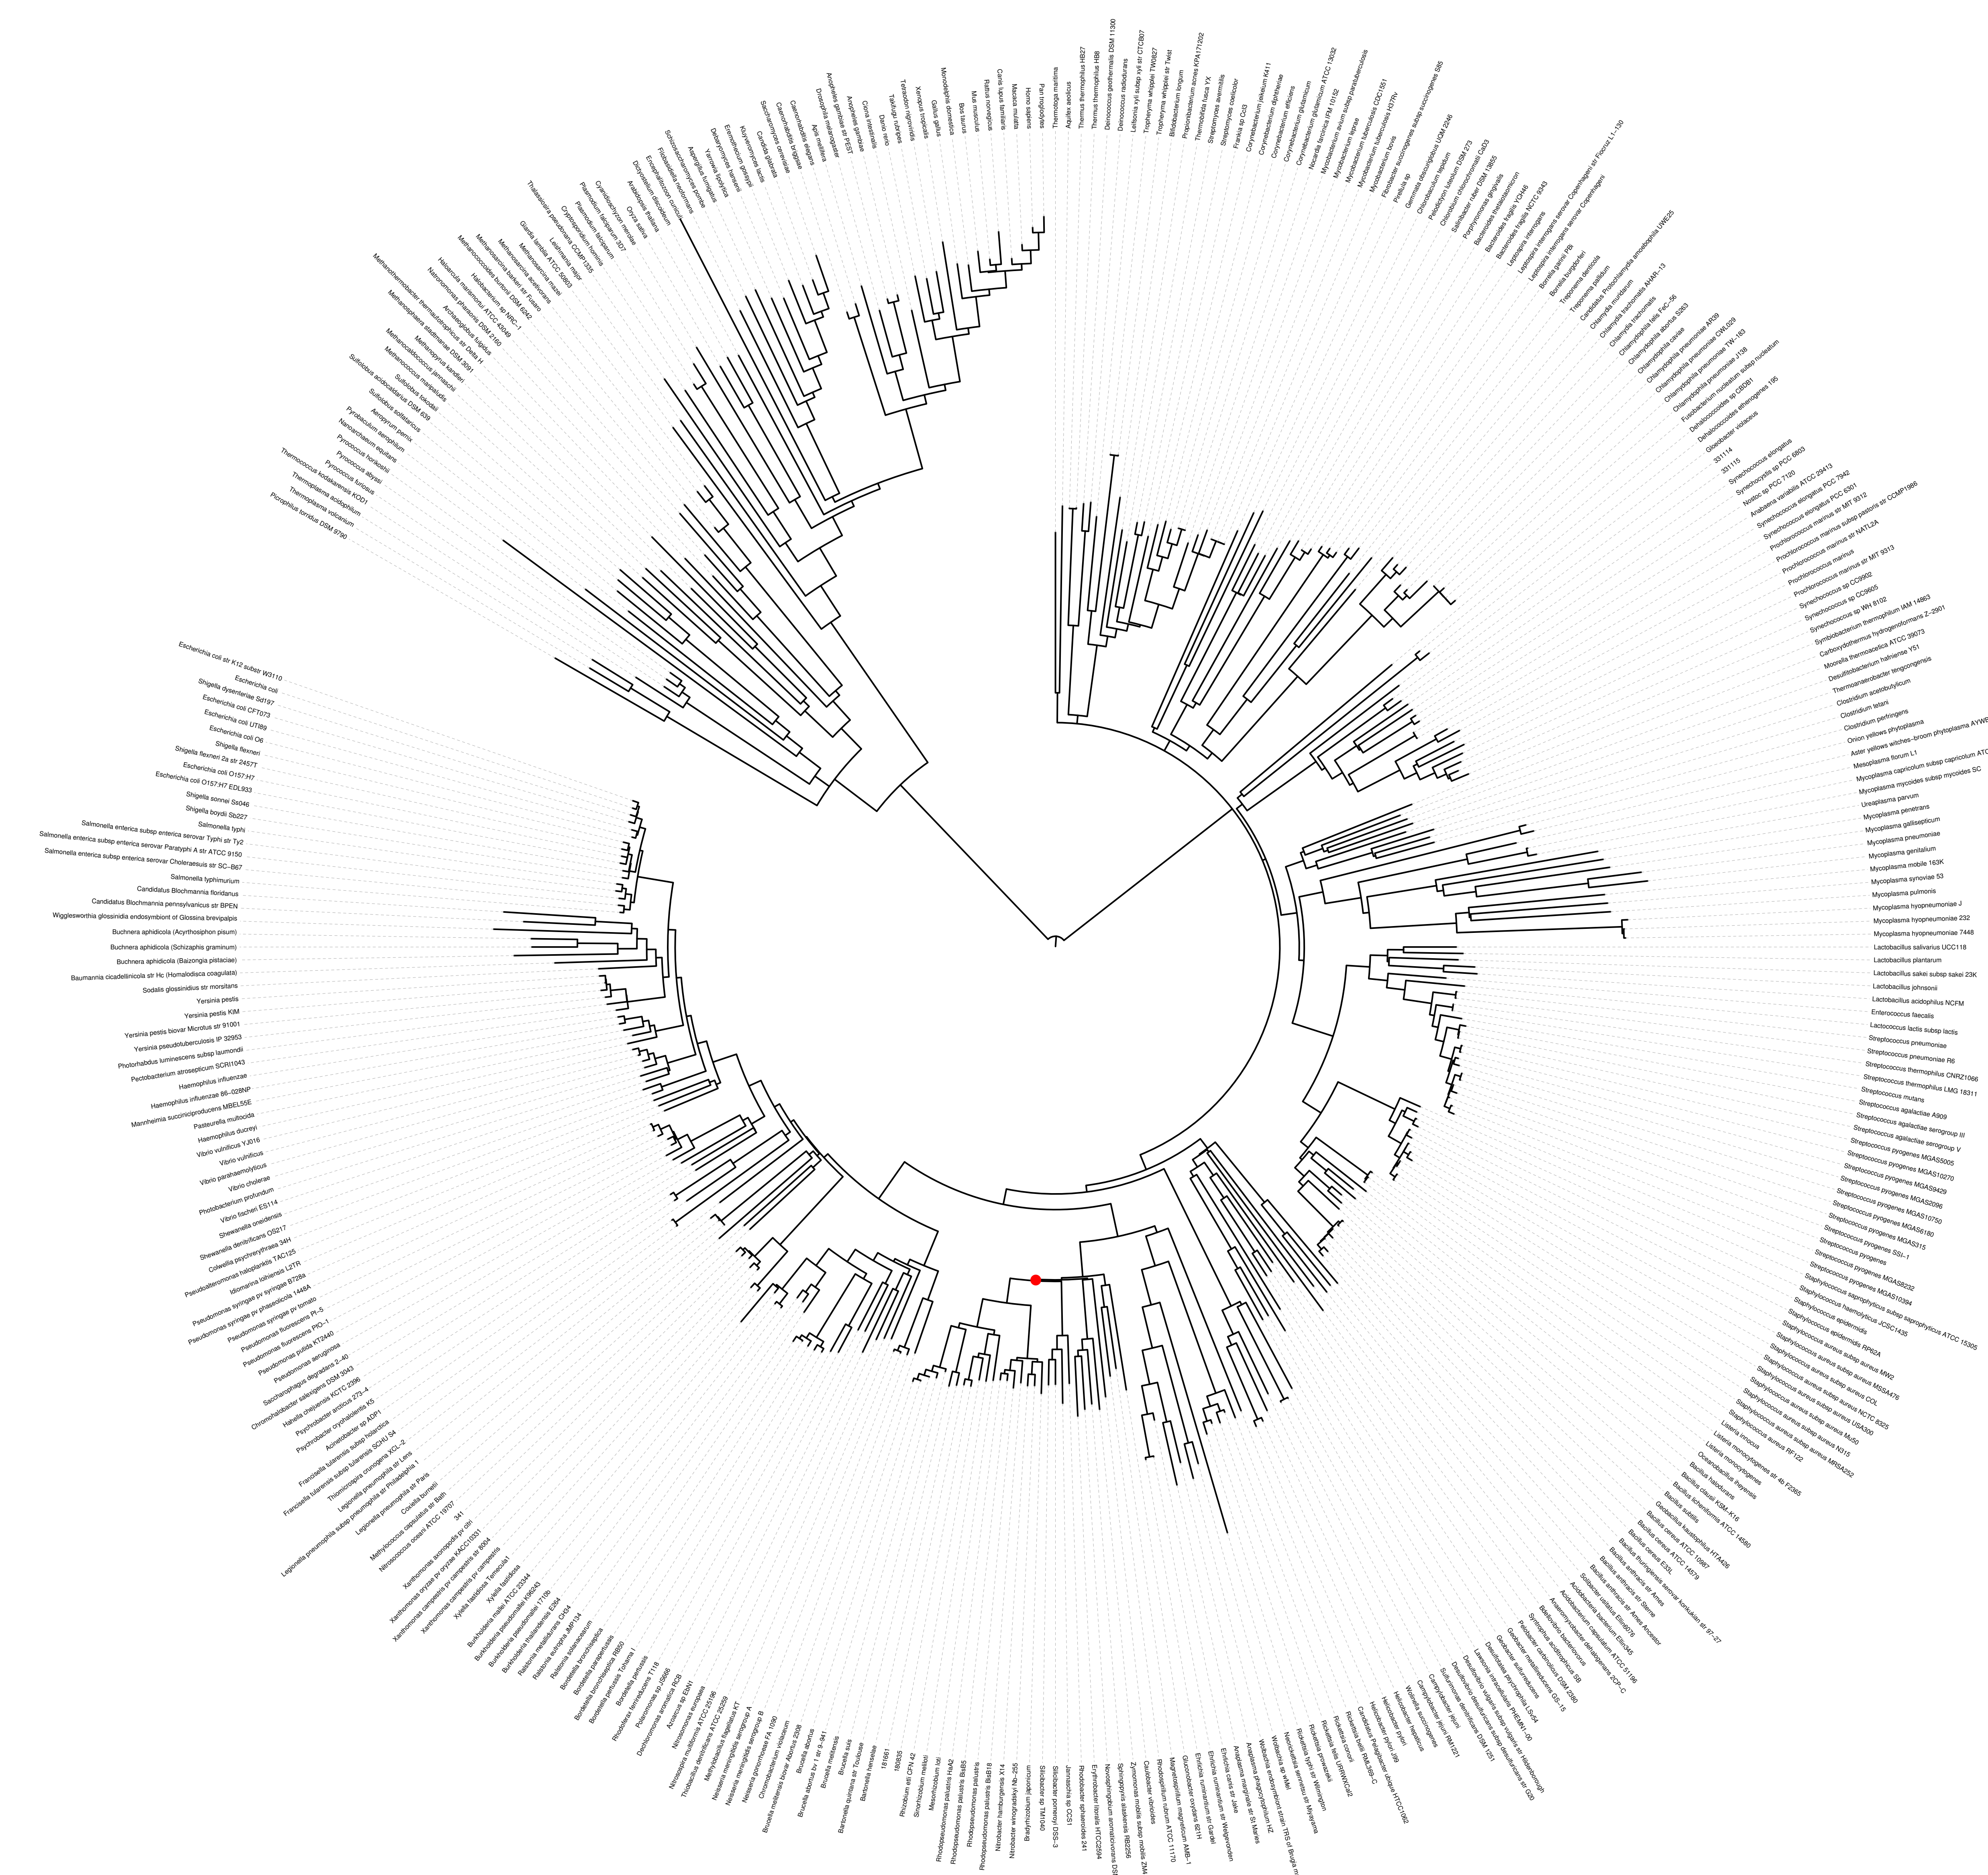

Supplement: pone.0003976.s002.pdf [file pone.0003976.s002.pdf]
