# Supplementary material for: A Nitrile Hydratase in the Eukaryote Monosiga brevicollis
Source: PLOS journal article supplement (doi:10.1371/journal.pone.0003976), 2008-12-19
Supplement: S5 (10.1371/journal.pone.0003976.s005) [file journal.pone.0003976.s005]

*Monosiga brevicollis* NHase

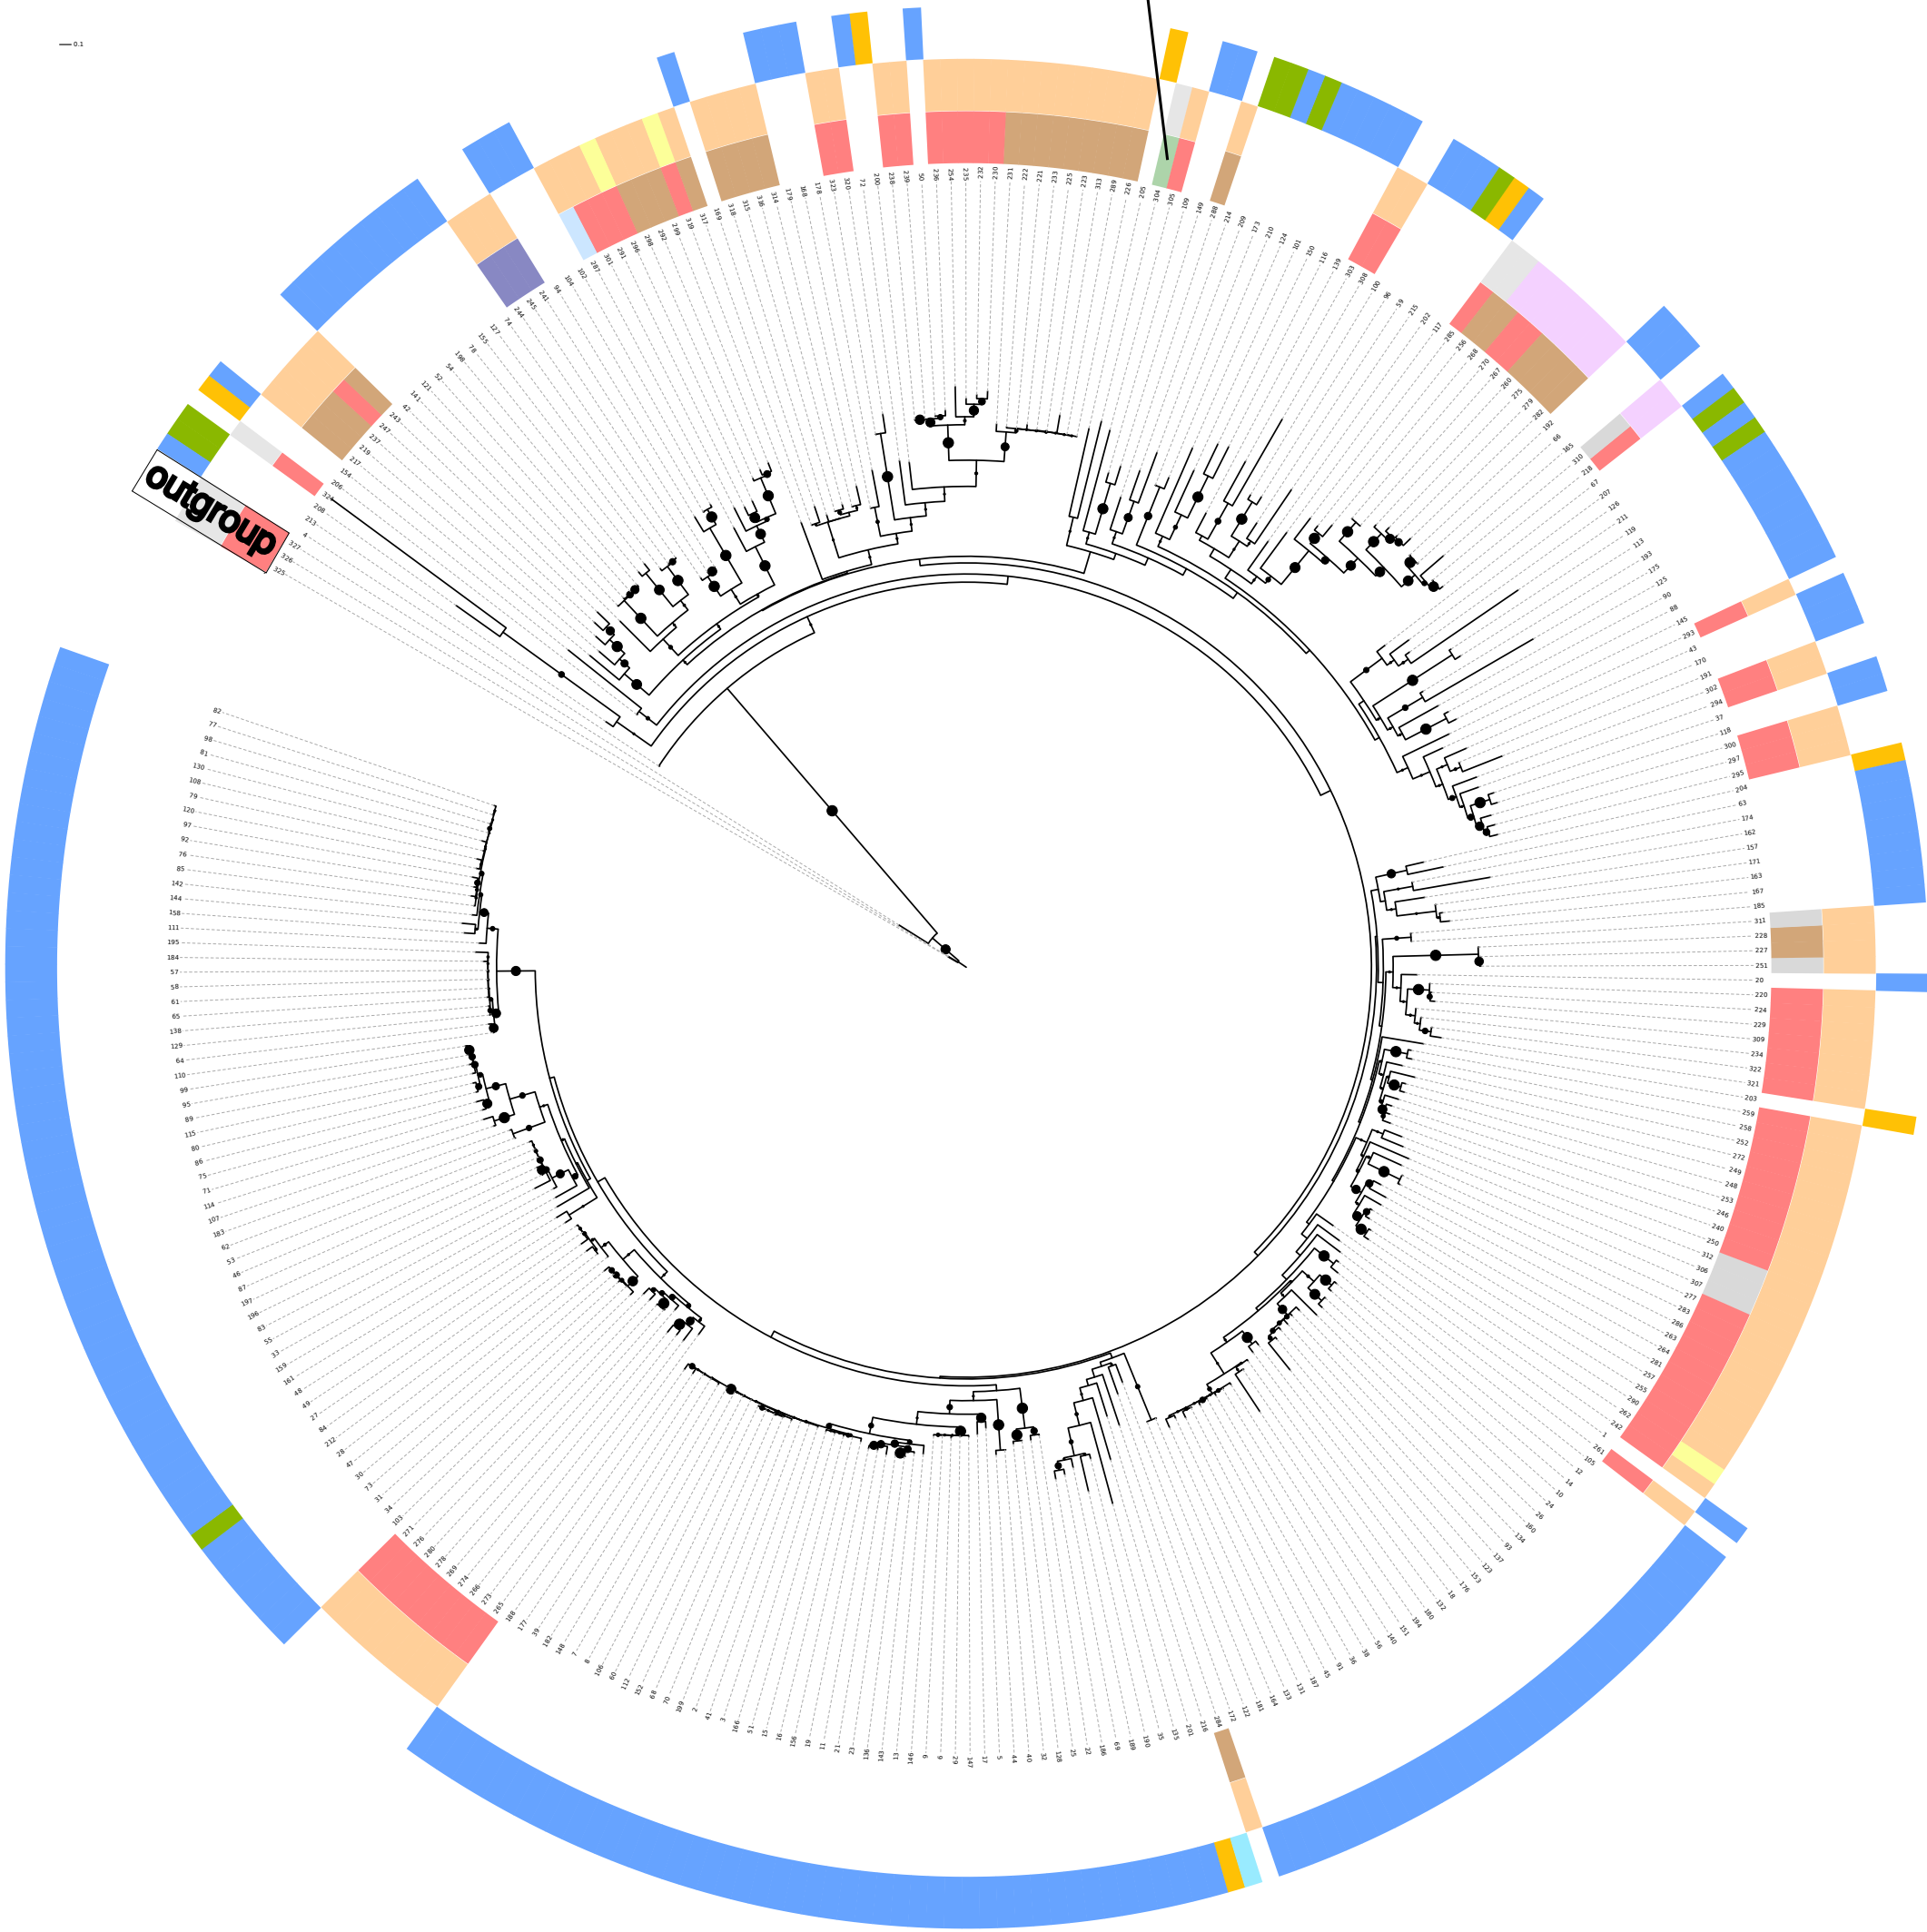

UniRef taxonomy (inner ring)

- Actinobacteria
- Choanoflagellida
- Cyanobacteria
- Firmicutes
- Proteobacteria
- Uncultured

Functional annotation (second ring)

- NHase
- Putative NHase
- SCNase
- Unknown

Environments (outer ring)

- AMD
- GOS
- MFS
- NPSG
- WLF
